# Supplementary material
Source: PubMed Central journal article supplement (PMC4920315)
Supplement: rspb20160392supp1.pdf [file rspb20160392supp1.pdf]

Table S1. Sources of *Mytilus californianus* in Washington State used in this study, with length in mm when the entire shell was available for measurement. Tatoosh site abbreviations include: HC=Hedophyllum, FN=Father, GL=Glacier, NI=North Island.

| Locale (site when known)    | Size range, length in mm   | Time era                 | Source                           |
|-----------------------------|----------------------------|--------------------------|----------------------------------|
| Tatoosh Island (HC, FN, GL) | Maximum<br>67 – 200        | Modern<br>2009-2011      | CAP, SJM, JTW                    |
| Tatoosh Island (likely GL)  | Maximum,<br>109 – 199      | Archival<br>1970s        | THS                              |
| Tatoosh Island              | Maximum<br>80 – 117 (est.) | Midden,<br>1000-1340 yBP | Makah Cultural & Research Center |
| Tatoosh Island (GL site)    | Minimum<br>13 – 45         | Archival<br>1974-1976    | RTP, THS                         |
| Tatoosh Island (GL site)    | Minimum<br>13 – 45         | Modern<br>2011-2012      | CAP                              |
| Tatoosh Island (NI site)    | Mid-range<br>56 – 72       | Archival<br>2001         | ES                               |
| Tatoosh Island (NI site)    | Mid-range<br>56 – 72       | Modern<br>2011-2012      | CAP                              |
| Sand Point                  | Maximum<br>55 – 112 (est.) | Midden<br>2150-2420 yBP  | Olympic Natl Park                |
| Sand Point (North)          | Maximum<br>49 – 62         | Modern<br>2010           | CAP                              |
| Sand Point (Yellow Banks)   | Maximum<br>98 – 117        | Modern<br>2010           | JTW                              |
